# Supplementary material for: Immunological and prognostic significance of tumour necrosis in colorectal cancer
Source: PubMed Central journal article supplement (PMC10241859; doi:10.1038/s41416-023-02258-2), 2023-04-08
Supplement: 41416_2023_2258_MOESM1_ESM.pdf [file 41416_2023_2258_MOESM1_ESM.pdf]

## Supplementary material

Table S1. Multivariable Cox regression models for cancer-specific survival and overall survival in Cohort 1.

| Variable                                      | Cancer-specific survival | Overall survival |
|-----------------------------------------------|--------------------------|------------------|
|                                               | Multivariable            | Multivariable    |
|                                               | HR (95% CI)              | HR (95% CI)      |
| Necrosis                                      |                          |                  |
| < 3%                                          | 1 (referent)             | 1 (referent)     |
| 3-9.9%                                        | 1.76 (1.02-3.04)         | 1.19 (0.85-1.66) |
| 10-39.9%                                      | 2.35 (1.34-4.11)         | 1.44 (1.02-2.04) |
| >40%                                          | 3.22 (1.68-6.17)         | 1.88 (1.19-2.97) |
| Age                                           |                          |                  |
| <65                                           | 1 (referent)             | 1 (referent)     |
| 65-75                                         | 1.25 (0.92-1.68)         | 1.39 (1.08-1.78) |
| >75                                           | 2.04 (1.52-2.74)         | 3.17 (2.51-4.01) |
| Sex                                           |                          |                  |
| Male                                          | 1 (referent)             | 1 (referent)     |
| Female                                        | 0.95 (0.74-1.20)         | 0.77 (0.65-0.93) |
| Time of operation                             |                          |                  |
| 2000 to 2005                                  | 1 (referent)             | 1 (referent)     |
| 2006 to 2010                                  | 0.62 (0.47-0.83)         | 0.69 (0.56-0.85) |
| 2011 to 2015                                  | 0.48 (0.36-0.65)         | 0.61 (0.49-0.77) |
| Tumor location                                |                          |                  |
| Proximal colon                                | 1 (referent)             | 1 (referent)     |
| Distal colon                                  | 0.91 (0.70-1.19)         | 0.96 (0.79-1.17) |
| Rectum                                        | 0.92 (0.64-1.33)         | 0.95 (0.72-1.25) |
| T                                             |                          |                  |
| 1-2                                           | 1 (referent)             | 1 (referent)     |
| 3-4                                           | 2.28 (1.39-3.74)         | 1.31 (1.02-1.71) |
| N                                             |                          |                  |
| 0                                             | 1 (referent)             | 1 (referent)     |
| 1-2                                           | 2.22 (1.67-2.95)         | 1.40 (1.15-1.71) |
| M                                             |                          |                  |
| 0                                             | 1 (referent)             | 1 (referent)     |
| 1                                             | 7.44 (5.65-9.79)         | 5.89 (4.67-7.41) |
| Tumor grade                                   |                          |                  |
| Low-grade (well to moderately differentiated) | 1 (referent)             | 1 (referent)     |
| High-grade (poorly differentiated)            | 1.98 (1.45-2.70)         | 1.90 (1.50-2.41) |
| Lymphovascular invasion                       |                          |                  |
| No                                            | 1 (referent)             | 1 (referent)     |
| Yes                                           | 1.74 (1.35-2.25)         | 1.52 (1.23-1.86) |
| MMR status                                    |                          |                  |
| MMR proficient                                | 1 (referent)             | 1 (referent)     |
| MMR deficient                                 | 0.51 (0.31-0.84)         | 0.65 (0.46-0.92) |
| <i>BRAF</i> status                            |                          |                  |
| Wild-type                                     | 1 (referent)             | 1 (referent)     |
| Mutant                                        | 1.36 (0.90-2.07)         | 1.46 (1.08-2.00) |

Abbreviations: CI, confidence interval; HR, hazard ratio; MMR, mismatch repair.

**Table S2 Comparison of the prognostic power of Tumor necrosis percentage and the Glasgow Microenvironment Score (GMS) using Cox regression models for cancer-specific survival.**

| Variable                              | No. of cases | No. of events | Model 1 (univariable)<br>HR (95% CI) | Model 2 (multivariable)<br>HR (95% CI) | Model 3 (multivariable)<br>HR (95% CI) |
|---------------------------------------|--------------|---------------|--------------------------------------|----------------------------------------|----------------------------------------|
| <b>Tumor necrosis percentage</b>      |              |               |                                      |                                        |                                        |
| < 3%                                  | 100          | 15            | 1 (referent)                         | 1 (referent)                           | 1 (referent)                           |
| 3-9.9%                                | 577          | 145           | 1.73 (1.01-2.94)                     | 1.54 (0.90-2.62)                       | 1.82 (1.05-3.14)                       |
| 10-39.9%                              | 327          | 107           | 2.45 (1.43-4.20)                     | 1.82 (1.06-3.13)                       | 2.35 (1.34-4.11)                       |
| ≥40%                                  | 59           | 28            | 4.24 (2.27-7.94)                     | 2.65 (1.41-4.98)                       | 2.87 (1.50-5.51)                       |
| <i>p</i> <sub>trend</sub>             |              |               | <0.0001                              | 0.0011                                 | 0.00023                                |
| <b>Glasgow Microenvironment Score</b> |              |               |                                      |                                        |                                        |
| GMS0                                  | 462          | 54            | 1 (referent)                         | 1 (referent)                           | 1 (referent)                           |
| GMS1                                  | 314          | 93            | 2.94 (2.10-4.12)                     | 2.82 (2.02-3.96)                       | 1.82 (1.28-2.59)                       |
| GMS2                                  | 287          | 148           | 6.21 (4.54-8.49)                     | 5.75 (4.19-7.89)                       | 2.40 (1.66-3.45)                       |
| <i>p</i> <sub>trend</sub>             |              |               | <0.0001                              | <0.0001                                | <0.0001                                |

The analysis was based on Cohort 1 (N=1,063). The patients who died within 30 days or less after the surgery (N=37) were excluded.

Model 2: Cox proportional hazards regression model that included tumor necrosis percentage and the Glasgow Microenvironment Score.

Model 3: Cox proportional hazards regression model based on Model 2 that was additionally adjusted for age (<65, 65-75, >75), sex (male, female), T (1-2, 3-4), N (0, 1-2), M (0, 1), tumor location (proximal colon, distal colon, rectum), year of operation (2000-2005, 2006-2010, 2011-2015), lymphatic or venous invasion (no, yes), grade (low-grade, high-grade), MMR status (proficient, deficient), and *BRAF* status (wild-type, mutant).

*p*<sub>trend</sub> values were calculated by using the four ordinal categories of tumor necrosis percentage and three ordinal categories of the Glasgow Microenvironment Score as continuous variables in univariable and multivariable Cox proportional hazard regression models.

Abbreviations: HR, hazard ratio; CI, confidence interval.

**Table S3: Correlations between tumor necrosis percentage and tumor infiltrating immune cells in Cohort 1.**

| Variable | N<br>(Unadjusted,<br>Adjusted) | Unadjusted |         | Adjusted |         |
|----------|--------------------------------|------------|---------|----------|---------|
|          |                                | Pearson r  | p value | Beta     | p value |
| CD3 IM   | 1042, 1042                     | -0.071     | 0.023   | -0.052   | 0.097   |
| CD3 CT   | 1082, 1082                     | -0.115     | 0.0001  | -0.099   | 0.0013  |
| CD8 IM   | 1052, 1052                     | -0.075     | 0.015   | -0.059   | 0.057   |
| CD8 CT   | 1084, 1084                     | -0.083     | 0.006   | -0.058   | 0.060   |

Abbreviations: IM, invasive margin; CT, center of tumor. The adjusted correlation coefficients (beta) were based on multivariable linear regression models that included age (continuous), sex (male, female), MMR status (proficient, deficient), *BRAF* mutation status (wild-type, mutant), tumor location (colon, rectum) and stage (I-II, III-IV).

**Table S4. Tumor and patient characteristics and their association with tumor necrosis in Cohort 2.**

| Characteristic    |                | Tumor necrosis percentage |          |           |          |           | p value |
|-------------------|----------------|---------------------------|----------|-----------|----------|-----------|---------|
|                   |                | Total N (%)               | < 3%     | 3–9.9%    | 10–39.9% | ≥40%      |         |
| Sex               | Male           | 144 (50%)                 | 25 (17%) | 62 (43%)  | 41 (28%) | 16 (11%)  | 0.16    |
|                   | Female         | 143 (50%)                 | 36 (25%) | 45 (31%)  | 47 (33%) | 15 (10%)  |         |
| Age               | <65            | 92 (31%)                  | 23 (25%) | 26 (28%)  | 31 (34%) | 12 (13%)  | 0.23    |
|                   | 65-75          | 84 (29%)                  | 17 (20%) | 40 (48%)  | 20 (24%) | 7 (8.3%)  |         |
|                   | >75            | 111 (39%)                 | 21 (19%) | 41 (37%)  | 37 (33%) | 12 (11%)  |         |
| Tumor location    | Proximal colon | 123 (43%)                 | 33 (27%) | 41 (33%)  | 32 (26%) | 17 (14%)  | 0.061   |
|                   | Distal colon   | 73 (25%)                  | 8 (11%)  | 28 (38%)  | 30 (41%) | 7 (9.6%)  |         |
| T                 | Rectum         | 91 (32%)                  | 20 (22%) | 38 (42%)  | 26 (29%) | 7 (7.7%)  | <0.0001 |
|                   | T1             | 15 (5.2%)                 | 6 (40%)  | 7 (47%)   | 2 (13%)  | 0 (0%)    |         |
| T2                | 68 (24%)       | 25 (37%)                  | 28 (41%) | 13 (19%)  | 2 (2.9%) |           |         |
| T3                | 182 (63%)      | 28 (15%)                  | 69 (38%) | 64 (35%)  | 21 (12%) |           |         |
| T4                | 22 (7.7%)      | 2 (9.0%)                  | 3 (14%)  | 9 (41%)   | 8 (36%)  |           |         |
| N*                | N0             | 165 (58%)                 | 46 (28%) | 65 (39%)  | 44 (27%) | 10 (6.0%) | <0.0001 |
|                   | N1             | 78 (27%)                  | 10 (13%) | 33 (42%)  | 26 (33%) | 9 (12%)   |         |
|                   | N2             | 43 (15%)                  | 5 (12%)  | 9 (21%)   | 18 (42%) | 11 (26%)  |         |
| M                 | M0             | 246 (86%)                 | 57 (23%) | 102 (41%) | 65 (26%) | 22 (10%)  | <0.0001 |
|                   | M1             | 41 (14%)                  | 4 (9.8%) | 5 (12%)   | 23 (56%) | 9 (22%)   |         |
| Stage*            | I              | 66 (23%)                  | 27 (41%) | 27 (41%)  | 11 (17%) | 1 (1.5%)  | <0.0001 |
|                   | II             | 93 (33%)                  | 18 (19%) | 37 (40%)  | 30 (32%) | 8 (8.6%)  |         |
|                   | III            | 86 (30%)                  | 12 (14%) | 38 (44%)  | 24 (28%) | 12 (14%)  |         |
|                   | IV             | 41 (14%)                  | 4 (9.8%) | 5 (12%)   | 23 (56%) | 9 (22%)   |         |
| WHO grade         | Low-grade      | 251 (88%)                 | 52 (21%) | 100 (40%) | 78 (31%) | 21 (8.4%) | 0.002   |
|                   | High-grade     | 36 (13%)                  | 9 (25%)  | 7 (19%)   | 10 (28%) | 10 (28%)  |         |
| MMR enzyme status | Proficient     | 247 (86%)                 | 42 (17%) | 93 (38%)  | 84 (34%) | 28 (11%)  | <0.0001 |
|                   | Deficient      | 40 (14%)                  | 19 (48%) | 14 (35%)  | 4 (10%)  | 3 (7.5%)  |         |
| BRAF status       | Wild-type      | 105 (90%)                 | 13 (12%) | 38 (36%)  | 41 (39%) | 13 (12%)  | 0.27    |
|                   | Mutant         | 12 (10%)                  | 3 (25%)  | 4 (33%)   | 2 (17%)  | 3 (25%)   |         |

\* Data missing from one patient

**Table S5. Multivariable Cox regression models for cancer-specific survival and overall survival in Cohort 2.**

| Variable                                      | Cancer-specific survival  |                                            |
|-----------------------------------------------|---------------------------|--------------------------------------------|
|                                               | Multivariable HR (95% CI) | Overall survival Multivariable HR (95% CI) |
| Necrosis                                      |                           |                                            |
| < 3%                                          | 1 (referent)              | 1 (referent)                               |
| 3-9,9%                                        | 1.80 (0.71-4.60)          | 1.08 (0.62-1.88)                           |
| 10-39.9%                                      | 1.85 (0.75-4.54)          | 1.10 (0.62-1.96)                           |
| >40%                                          | 3.39 (1.04-8.96)          | 1.70 (0.86-3.36)                           |
| Age                                           |                           |                                            |
| <65                                           | 1 (referent)              | 1 (referent)                               |
| 65-75                                         | 1.88 (1.03-3.42)          | 1.96 (1.17-3.30)                           |
| >75                                           | 2.21 (1.16-4.19)          | 4.83 (2.94-7.94)                           |
| Sex                                           |                           |                                            |
| Male                                          | 1 (referent)              | 1 (referent)                               |
| Female                                        | 1.36 (0.83-2.21)          | 1.00 (0.69-1.44)                           |
| Year of operation                             |                           |                                            |
| 2006 to Jan 2010                              | 1 (referent)              | 1 (referent)                               |
| Feb 2010 to 2014                              | 0.65 (0.39-1.09)          | 0.69 (0.47-1.02)                           |
| Tumor location                                |                           |                                            |
| Proximal colon                                | 1 (referent)              | 1 (referent)                               |
| Distal colon                                  | 1.24 (0.66-2.33)          | 1.12 (0.69-1.84)                           |
| Rectum                                        | 0.94 (0.52-1.73)          | 1.06 (0.67-1.67)                           |
| T                                             |                           |                                            |
| 1-2                                           | 1 (referent)              | 1 (referent)                               |
| 3-4                                           | 3.60 (1.63-7.91)          | 1.44 (0.89-2.33)                           |
| N                                             |                           |                                            |
| 0                                             | 1 (referent)              | 1 (referent)                               |
| 1-2                                           | 3.39 (1.78-6.44)          | 1.78 (1.15-2.75)                           |
| M                                             |                           |                                            |
| 0                                             | 1 (referent)              | 1 (referent)                               |
| 1                                             | 8.59 (4.71-15.67)         | 6.39 (3.93-10.40)                          |
| Tumor grade                                   |                           |                                            |
| Low-grade (well to moderately differentiated) | 1 (referent)              | 1 (referent)                               |
| High-grade (poorly differentiated)            | 1.50 (0.78-2.92)          | 1.02 (0.60-1.74)                           |
| Lymphovascular invasion                       |                           |                                            |
| No                                            | 1 (referent)              | 1 (referent)                               |
| Yes                                           | 1.55 (0.79-3.05)          | 1.14 (0.72-1.79)                           |
| MMR status                                    |                           |                                            |
| MMR proficient                                | 1 (referent)              | 1 (referent)                               |
| MMR deficient                                 | 0.16 (0.02-1.25)          | 0.83 (0.41-1.69)                           |
| <i>BRAF</i> status                            |                           |                                            |
| Wild-type                                     | 1 (referent)              | 1 (referent)                               |
| Mutant                                        | 2.02 (0.77-5.33)          | 1.41 (0.70-2.81)                           |

Abbreviations: CI, confidence interval; HR, hazard ratio; MMR, mismatch repair.

**Table S6. Correlations between tumor necrosis percentage and tumor infiltrating immune cells in Cohort 2.**

| Variable      | N<br>(Unadjusted,<br>Adjusted) | Unadjusted |         | Adjusted |         |
|---------------|--------------------------------|------------|---------|----------|---------|
|               |                                | Pearson r  | p value | Beta     | p value |
| CD3 IM        | 287, 286                       | -0.104     | 0.078   | -0.009   | 0.88    |
| CD3 CT        | 287, 286                       | -0.167     | 0.004   | -0.071   | 0.23    |
| CD3 IEL       | 287, 286                       | -0.157     | 0.008   | -0.056   | 0.36    |
| CD8 IM        | 287, 286                       | -0.131     | 0.026   | -0.050   | 0.40    |
| CD8 CT        | 287, 286                       | -0.193     | 0.001   | -0.100   | 0.096   |
| CD8 IEL       | 287, 286                       | -0.122     | 0.038   | -0.024   | 0.69    |
| FoxP3 IM      | 286, 285                       | -0.233     | <0.001  | -0.113   | 0.067   |
| FoxP3 CT      | 286, 285                       | -0.208     | <0.001  | -0.109   | 0.068   |
| Mast cell IM  | 286, 285                       | -0.274     | <0.001  | -0.196   | 0.001   |
| Mast cell CT  | 286, 285                       | -0.079     | 0.18    | -0.034   | 0.55    |
| Neutrophil IM | 282, 281                       | -0.065     | 0.27    | 0.018    | 0.76    |
| Neutrophil CT | 282, 281                       | -0.039     | 0.51    | 0.033    | 0.56    |

The adjusted correlation coefficients (beta) were based on multivariable linear regression models that included age (continuous), sex (male, female), tumor location (colon, rectum), stage (I-II, III-IV), MMR enzyme status (proficient, deficient), and *BRAF* status (wild-type, mutant).

Abbreviations: IM, invasive margin; CT, center of tumor; IEL, intraepithelial

**Table S7. Associations between mismatch repair (MMR) status and immune cells in Cohort 2.**

|               | N<br>(Proficient,<br>Deficient) | MMR proficient,<br>Median (IQR) | MMR deficient,<br>Median (IQR) | p value |
|---------------|---------------------------------|---------------------------------|--------------------------------|---------|
| CD3 IM        | 247,40                          | 561 (323-800)                   | 787 (578-1170)                 | <0.0001 |
| CD3 CT        | 247,40                          | 399 (217-651)                   | 699 (251-1150)                 | 0.0033  |
| CD3 IEL       | 247,40                          | 18.8 (6.06-57.7)                | 60.3 (18.9-267)                | <0.0001 |
| CD8 IM        | 247,40                          | 160 (84.8-319)                  | 335 (139-681)                  | <0.0001 |
| CD8 CT        | 247,40                          | 89.6 (31.6-198)                 | 273 (68.4-591)                 | 0.0002  |
| CD8 IEL       | 247,40                          | 12.5 (3.29-44.2)                | 46.5 (16.9-206)                | <0.0001 |
| FoxP3 IM      | 246,40                          | 166 (84.3-254)                  | 300 (116-410)                  | 0.0001  |
| FoxP3 CT      | 246,40                          | 134 (65.0-257)                  | 170 (75.6-383)                 | 0.080   |
| Mast IM       | 246,40                          | 40.6 (26.2-74.0)                | 57.5 (26.4-104)                | 0.043   |
| Mast CT       | 246,40                          | 28.4 (14.8-54.3)                | 33.8 (21.1-55.2)               | 0.356   |
| Neutrophil IM | 242,40                          | 38.3 (10.0-129)                 | 96.1 (18.5-269)                | 0.041   |
| Neutrophil CT | 242,40                          | 24.4 (6.67-87.2)                | 66.4 (13.3-169)                | 0.005   |

Abbreviations: IM, invasive margin; CT, center of tumor; IEL, intraepithelial; IQR, interquartile range

**Table S8. Tumor and patient characteristics in Cohort 3 and their association with tumor necrosis.**

| Characteristic |                | Total N(%) | Tumor necrosis percentage |          |          |          | p value |
|----------------|----------------|------------|---------------------------|----------|----------|----------|---------|
|                |                |            | < 3%                      | 3–9.9%   | 10–39.9% | ≥40%     |         |
| Sex            | Male           | 14 (54%)   | 3 (21%)                   | 4 (29%)  | 6 (43%)  | 1 (7.1%) | 0.56    |
|                | Female         | 12 (46%)   | 3 (25%)                   | 6 (50%)  | 3 (25%)  | 0 (0%)   |         |
| Age            | ≤65            | 5 (19%)    | 2 (40%)                   | 2 (40%)  | 1 (20%)  | 0 (0%)   | 0.75    |
|                | >65            | 21 (81)    | 4 (19%)                   | 8 (38 %) | 8 (38%)  | 1 (4.8%) |         |
| Tumor location | Proximal colon | 18 (69%)   | 6 (33%)                   | 7 (39%)  | 4 (22%)  | 1 (5.6%) | 0.36    |
|                | Distal colon   | 8 (31%)    | 0 (0%)                    | 3 (38%)  | 5 (63%)  | 0 (0%)   |         |
| T              | T1             | 2 (7.7%)   | 0 (0%)                    | 2 (100%) | 0 (0%)   | 0 (0%)   | 0.30    |
|                | T2             | 9 (35%)    | 3 (33%)                   | 4 (44%)  | 2 (22%)  | 0 (0%)   |         |
|                | T3             | 10 (39%)   | 2 (20%)                   | 2 (20%)  | 6 (60%)  | 0 (0%)   |         |
|                | T4             | 5 (19%)    | 1 (20%)                   | 2 (40%)  | 1 (20%)  | 1 (20%)  |         |
| N              | N0             | 17 (65%)   | 3 (18%)                   | 7 (41%)  | 7 (41%)  | 0 (0%)   | 0.30    |
|                | N1             | 4 (15%)    | 1 (25%)                   | 2 (50%)  | 0 (0%)   | 1 (25%)  |         |
|                | N2             | 5 (19%)    | 2 (40%)                   | 1 (20%)  | 2 (40%)  | 0 (0%)   |         |
| M Stage        | M0             | 26 (100%)  | 6 (23%)                   | 10 (38%) | 9 (35%)  | 1 (3.8%) | 0.24    |
|                | I              | 10 (39%)   | 2 (20%)                   | 6 (60%)  | 2 (20%)  | 0 (0%)   |         |
|                | II             | 7 (27%)    | 1 (14%)                   | 1 (14%)  | 5 (71%)  | 0 (0%)   |         |
|                | III            | 9 (35%)    | 3 (33%)                   | 3 (33%)  | 2 (22%)  | 1 (11%)  |         |
| WHO grade      | Low-grade      | 18 (69%)   | 2 (11%)                   | 9 (50%)  | 7 (39%)  | 0 (0%)   | 0.039   |
|                | High-grade     | 8 (31%)    | 4 (50%)                   | 1 (13%)  | 2 (25%)  | 1 (13%)  |         |
